# Supplementary material
Source: Elsevier journal article supplement (https://www.sciencedirect.com/science/article/pii/S021265672100158X)
Supplement: mmc2 [file S021265672100158X:mmc2.doc]

Anexo 2: Criterios de selección de participantes:

- Nivel Clúster: Cupos (conjuntos de pacientes atendidos por el mismo médico) de Atención Primaria de los 6 centros de salud del Sector Sanitario Tramuntana (Islas Baleares) cuyo médico responsable firmó el consentimiento informado para participar en el estudio.
- Nivel Paciente:
  - Criterios de inclusión: Pacientes que cumplan ambos criterios:
    - Mayores (edad ≥ 65 años), y
    - Polimedicados (tratamiento con ≥ 5 medicamentos prescritos de forma crónica, independiente de si se habían dispensado o no). Se consideró medicamento cualquier forma farmacéutica que estuviera tomando el paciente (incluyendo asociaciones de principios activos) de duración ≥ 6 meses.
  - Criterios de exclusión (por no disponer de la información clínica necesaria en la historia clínica y/o porque el enfoque terapéutico fuera conservador): Pacientes que cumplan alguno de los siguientes criterios:
    - Atención sanitaria habitual en la sanidad privada: Identificados con Alerta “Control Privada” en la Historia Clínica, o
    - Desplazados temporales: Atención sanitaria habitual en otra comunidad autónoma o servicio de salud, o
    - Pacientes institucionalizados: que residen en centros socio-sanitarios, cuya atención médica es prestada fundamentalmente por el médico del centro en lugar de por el médico de AP, o
    - Pacientes incluidos en el Programa de Atención Domiciliaria (PAD); al ser pacientes fundamentalmente con enfermedades crónicas en estadíos avanzados y que requieren un abordaje fundamentalmente paliativo, primando medidas de confort.
